# Supplementary material for: Do rotational shear-cushioning shoes influence horizontal ground reaction forces and perceived comfort during basketball cutting maneuvers?
Source: PeerJ. 2017 Nov 23;5:e4086. doi: 10.7717/peerj.4086 (PMC5702506; doi:10.7717/peerj.4086)
Supplement: Data S1 [file peerj-05-4086-s001.xlsx]

## Sheet: Sheet1
				45-cutting movement													Lateral shuffling
				Shear-cushioning shoe						Control shoe							Shear-cushioning shoe						Control shoe
SubjectNumber	Height	Body mass		cut45_brakingpeak_shearforce55C	cut45_braking_shearimpulse55C	cut45_contact_time55C	cut45_propulsionpeak_shearforce55C	cut45_propulsion_shearimpulse55C	Cut45_Forefootcushioning55c	cut45_brakingpeak_shearforce55Control	cut45_braking_shearimpulse55Control	cut45_contact_time55Control	cut45_propulsionpeak_shearforce55Control	cut45_propulsion_shearimpulse55Control	Cut45_ForefootcushioningControl		Shuffle_brakingpeak_shearforce55C	Shuffle_braking_shearimpulse55C	Shuffle_contact_time55C	Shuffle_propulsionpeak_shearforce55C	Shuffle_propulsion_shearimpulse55C	Shuffle_Forefootcushioning55c	Shuffle_brakingpeak_shearforce55Control	Shuffle_braking_shearimpulse55Control	Shuffle_contact_time55Control	Shuffle_propulsionpeak_shearforce55Control	Shuffle_propulsion_shearimpulse55Co	Shuffle_ForefootcushioningControl
1	183	66		2.1	0.21	0.22	1.02	0.03	14.1	1.92	0.21	0.23	1.03	0.03	11.8		1.59	0.36	0.5	0.96	0.17	9.65	1.26	0.31	0.45	0.91	0.14	11.4
2	173	56.3		1.25	0.18	0.25	1.05	0.05	10	1.17	0.18	0.25	1.16	0.06	8.45		1.5	0.42	0.51	1.12	0.2	5.9	1.29	0.4	0.54	1.01	0.2	10.3
3	179	77.6		1.46	0.2	0.2	1.39	0.07	10.8	1.54	0.2	0.19	1.48	0.07	9.45		1.43	0.45	0.72	0.96	0.21	10.75	1.04	0.39	0.65	0.79	0.18	9.25
4	178	81.3		1.47	0.22	0.24	1.31	0.08	9.1	1.48	0.19	0.21	1.29	0.06	7.85		1.14	0.34	0.67	0.82	0.17	13.6	0.99	0.34	0.68	0.83	0.17	10.35
5	176.5	77.2		1.59	0.2	0.21	1.4	0.07	9.7	1.58	0.2	0.22	1.4	0.07	11.5		1.02	0.33	0.45	0.95	0.15	10.4	1.03	0.34	0.46	0.97	0.16	10.55
6	175	68		1.69	0.22	0.24	1.3	0.08	10.75	1.86	0.22	0.25	1.22	0.08	11.05		1.03	0.38	0.61	0.79	0.19	12.45	1.54	0.39	0.5	0.98	0.19	12.05
7	186	77.6		1.29	0.18	0.23	1.15	0.05	5.84	1.35	0.18	0.23	1.14	0.06	5.29		1.26	0.33	0.51	0.85	0.15	7.12	1.27	0.34	0.49	0.91	0.16	6.81
8	175	66.5		1.46	0.21	0.23	1.13	0.03	9.92	1.51	0.21	0.23	1.08	0.03	9.6		1.44	0.36	0.5	0.96	0.16	11.8	1.52	0.33	0.5	0.89	0.15	10.29
9	178	67.5		1.38	0.2	0.26	1.09	0.07	9.59	1.34	0.22	0.25	1.12	0.06	5.69		1.4	0.34	0.45	0.98	0.16	9.7	1.41	0.35	0.45	1.01	0.17	7
10	182.5	63.9		1.72	0.23	0.21	1.56	0.07	7.56	1.8	0.25	0.23	1.5	0.07	6.81		1.06	0.32	0.36	0.85	0.14	8.1	1.32	0.38	0.44	1.06	0.17	7.92
11	176.5	65.1		1.73	0.23	0.21	1.64	0.09	10.7	1.9	0.26	0.22	1.69	0.07	8.6		1.29	0.37	0.46	1.05	0.18	8.8	1.26	0.34	0.43	1.09	0.16	9.5
12	183.5	75.6		2.22	0.27	0.28	1.23	0.09	8.2	1.93	0.24	0.25	1.29	0.07	8		1.69	0.42	0.59	0.97	0.2	10.2	1.6	0.42	0.62	0.93	0.18	8.8
13	186	76.5		1.53	0.23	0.33	0.82	0.07	12.8	1.18	0.2	0.3	0.87	0.06	12.8		0.92	0.32	0.53	0.82	0.14	12.7	0.96	0.27	0.42	0.86	0.12	12.6
14	175.5	64.2		1.55	0.23	0.24	1.18	0.05	10.05	1.66	0.23	0.22	1.29	0.04	5.4		1.22	0.38	0.56	0.89	0.18	7	0.95	0.35	0.54	0.91	0.17	6.35
15	172.5	75.6		1.67	0.23	0.25	1.25	0.08	9.4	1.46	0.21	0.25	1.08	0.05	3.5		1.62	0.38	0.51	0.98	0.17	7.3	1.62	0.42	0.55	0.98	0.19	4.5
mean	178.667	70.5933		1.60733	0.216	0.24	1.23467	0.0653333	9.90067	1.57867	0.213333	0.235333	1.24267	0.0586667	8.386		1.30733	0.366667	0.528667	0.93	0.171333	9.698	1.27067	0.358	0.514667	0.942	0.167333	9.178
SD	4.48675	7.15037		0.268394	0.0229285	0.0329502	0.211453	0.019223	1.96634	0.259556	0.0238048	0.0250333	0.211135	0.0150555	2.7144		0.240727	0.0394003	0.0910939	0.0919627	0.0219957	2.32293	0.235568	0.0416104	0.0816672	0.0832552	0.0205171	2.279
